# Supplementary material
Source: publisher figshare collection journal article supplement (https://acs.figshare.com/ndownloader/files/3944995)
Supplement: Supplementary file 1 [file 3944995]

# Supplementary Information

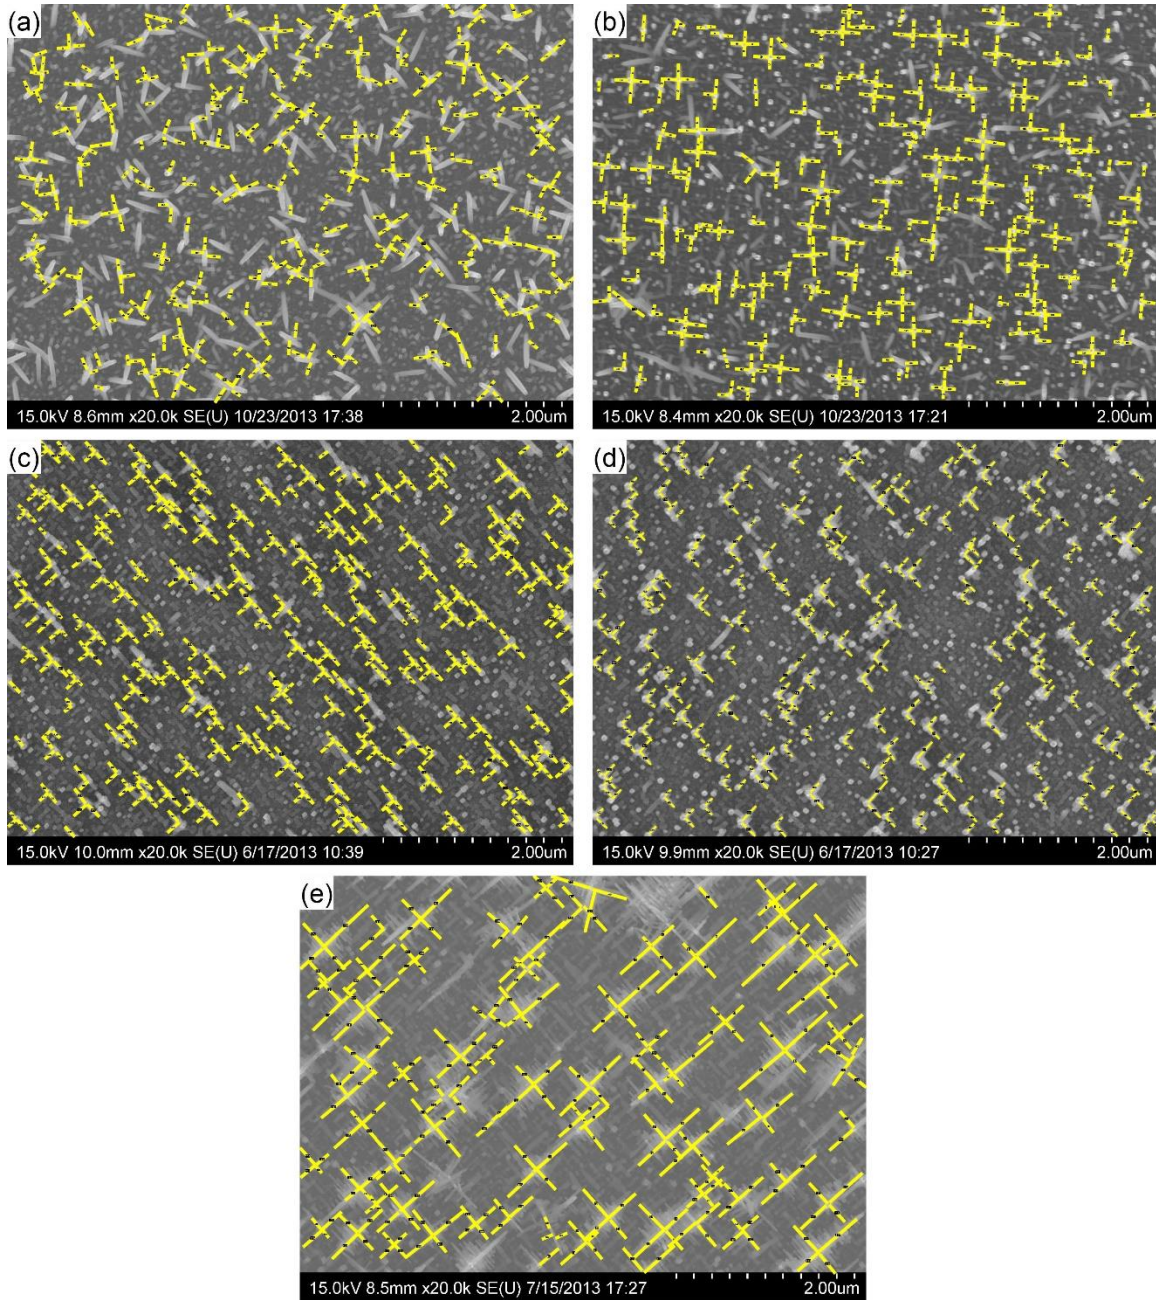

**Supp Fig 1:** One fifth of total branch orientation and length measurements for each of (a)  $\phi$  continuously rotated on Si, and (b)  $\phi$  continuously rotated, (c)  $\phi = 0^\circ$ , (d)  $\phi = 45^\circ$ , and (e) serial bi-deposition on YSZ. All films grown at  $\alpha = 85^\circ$ , 1 nm/s, and 300  $^\circ\text{C}$ .

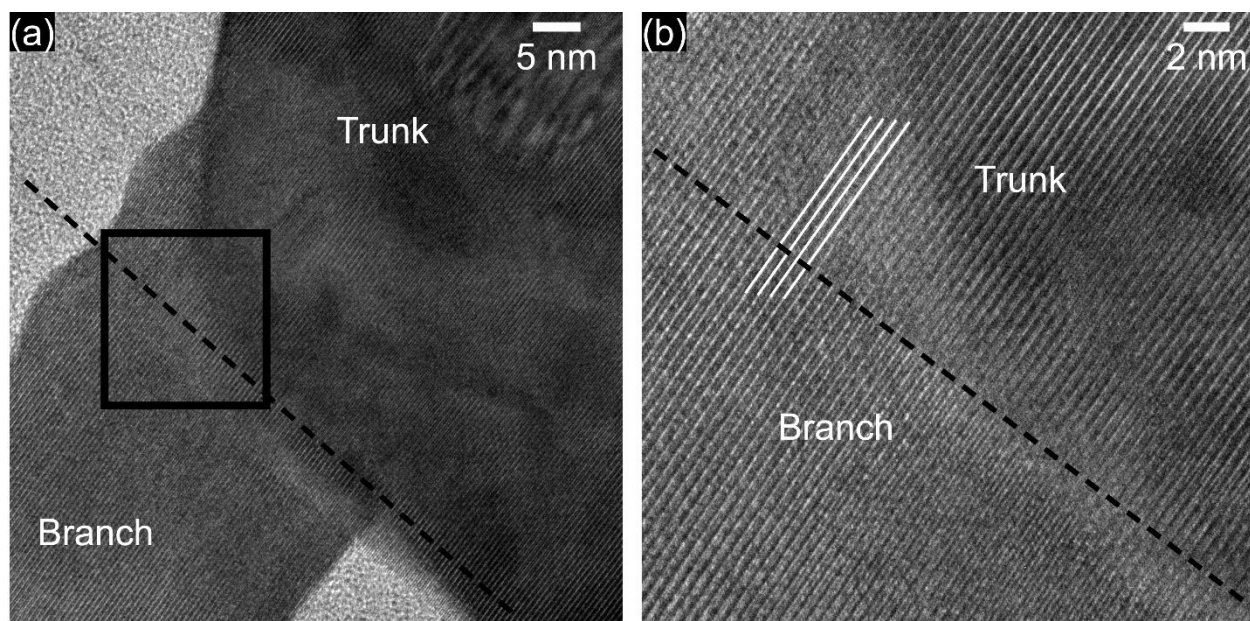

**Supp Fig 2:** HRTEM image of branch-trunk interface on an ITO nanotree. Region in (b) is imaged from black square in (a). Dashed black line indicates branch-trunk interface. While lines in (b) show continuous lattice planes from trunk into branch.
